# Supplementary material
Source: Frontiers journal article supplement (https://www.frontiersin.org/articles/316754)
Supplement: Table_1.DOCX [file Table_1.DOCX]

**Supplementary Table 1. Functional groups represented in the Atlantis-GOM ecosystem model.** The functional groups for which we produced distribution maps in the present study are highlighted in gray; for each of those, a reference species was identified (indicated in bold).

| **Functional group** | **Species making up the functional group** |
| --- | --- |
| Manatee | Florida manatee (*Trichechus manatus latirostris*) |
| Mysticeti | Bryde’s whale (*Balaenoptera edeni*), fin whale (*Balaenoptera physalus*) |
| Dolphins | Common bottlenose dolphin (*Tursiops truncatus*), Atlantic spotted dolphin (*Stenella frontalis*), Clymene dolphin (*Stenella clymene*), Fraser’s dolphin (*Lagenodelphis hosei*), pantropical spotted dolphin (*Stenella attenuata*), rough-toothed dolphin (*Steno bredanensis*), spinner dolphin (*Stenella longirostris*), striped dolphin (*Stenella coeruleoalba),* false killer whale (*Pseudorca crassidens*), killer whale (*Orcinus orca*), melon-headed whale (*Peponocephala electra*), pygmy killer whale (*Feresa attenuata*), Risso’s dolphin (*Grampus griseus*), short-finned pilot whale (*Globicephala macrorhynchus*) |
| Deep diving Odontocetae | Blainville’s beaked whale (*Mesoplodon densirostris*), Cuvier’s beaked whale (*Ziphius cavirostris*), Garvais’ beaked whale (*Mesoplodon europaeus*), dwarf sperm whale (*Kogia sima*), pygmy sperm whale (*Kogia breviceps*), sperm whale (*Physeter macrocephalus*) |
| Diving birds | Cory’s shearwater (*Calonectris diomedea*), black tern (*Chilodonias niger*), common loon (*Gavia immer*), gull-billed tern (*Gelochelidon nilotica*), great shearwater (*Puffinus gravis*), caspian tern (*Hydroprogne caspia*), herring gull (*Larus argentatus*), reing-billed gull (*Larus delawarensis*), laughing gull (*Leucophaeus atricilla*), Wilson’s storm petrel (*Oceanites oceanicus*), American white pelican (*Pelecanus erythrorhynchos*), brown pelican (*Pelecanus occidentalis*), double-crested cormorant (*Phalacrocorax auritus*), Audubon’s shearwater (*Puffinus lherminieri*), black skimmer (*Rynchops niger*), parasitic jaeger (*Stercorarius parasiticus*), pomarine jaeger (*Stercorarius pomarinus*), Foster’s tern (*Sterna forsteri*), common tern (*Sterna hirundo*), least tern (*Sternula antillarum*), masked booby (*Sula dactylatra*), brown booby (*Sula leucogaster*), royal tern (*Thalasseus maximus*), sandwich tern (*Thalasseus sandvicensis*) |
| Surface feeding birds | Magnificient frigatebird (*Fregata magnificiens*), northern gannet (*Morus bassanus*), band-rumped storm-petrel (*Oceanodroma castro*), leach’s storm petrel (*Oceanodroma leucorrhoa*), bridled tern (*Onychoprion anaethetus*), osprey (*Pandion haliaetus*) |
| Loggerhead turtle | Loggerhead turtle (*Caretta caretta*) |
| Kemp’s ridley sea turtle | Kemp’s ridley sea turtle (*Lepidochelys kempii*) |
| Other turtles | Leatherback turtle (*Dermochelys coriacea*), hawksbill turtle (*Eretmochelys imbricata*), green sea turtle (*Chelonia mydas*) |
| Blacktip shark | **Blacktip shark (*Carcharhinus limbatus*)** |
| Benthic feeding sharks | **Smalltooth sawfish (*Pristis pectinata*)**, nurse shark (*Ginglymostoma cirratum*), sharpnose sevengill shark (*Heptranchias perlo*), bluntnose sixgill shark (*Hexanchus griseus*), goblin shark (*Mitsukurina owstoni*), largetooth sawfish (*Pristis perotteti*), scalloped hammerhead shark (*Sphyrna lewini*), bonnet hammerhead (*Sphyrna tiburo*), Atlantic angel shark (*Squatina dumeril*), disparate angel shark (*Squatina heteroptera*) |
| Large sharks | **Sandbar shark (*Carcharhinus plumbeus*)**, big eye thresher shark (*Alopias superciliosus*), big-eye thresher (*Alopias vulpinus*), blacknose shark (*Carcharhinus acronotus*), bignose shark (*Carcharhinus altimus*), spinner shark (*Carcharhinus brevipinna*), silky shark (*Carcharhinus falciformis*), finetooth shark (*Carcharhinus isodon*), bull shark (*Carcharhinus leucas*), oceanic whitetip shark (*Carcharhinus longimanus*), dusky shark (*Carcharhinus obscurus*), Caribbean reef shark (*Carcharhinus perezii*), Caribbean sharpnose shark (*Carcharhinus porosus*), night shark (*Carcharhinus signatus*), sand tiger shark (*Carcharias taurus*), great white shark (*Carcharodon carcharias*), tiger shark (*Galeocerdo cuvier*), shortfin mako (*Isurus oxyrinchus*), longfin mako (*Isurus paucus*), lemon shark (*Negaprion brevirostris*), blue shark (*Prionace glauca*), great hammerhead (*Sphyrna mokarran*) |
| Filter feeding sharks | **Basking shark (*Cetorhinus maximus*)**, whale shark (*Rhincodon typus*) |
| Small sharks | **Atlantic sharpnose shark (*Rhizoprionodon terraenovae*)**, dogfish (*Squalus mitsukurii*), cat shark (*Apristurus laurussonii*), smallfin cat shark (*Apristurus parvipinnis*), broadgill cat shark (*Apristurus riveri*), needle dogfish (*Centrophorus acus*), gulper shark (*Centrophorus granulosus*), roughskin dogfish (*Cirrhigaleus asper*), black shark (*Dalatias licha*), blurred smooth lantern shark (*Etmopterus bigelowi*), blackbelly dogfish (*Etmopterus hillianus*), fringefin lantern shark (*Etmopterus schultzi*), green lantern shark (*Etmopterus virens*), cigar shark (*Isistius brasiliensis*), Atlantic smooth dogfish (*Mustelus canis*), Florida smooth hound (*Mustelus norrisi*), Gulf smooth hound (*Mustelus sinusmexicanus*), Cuban dogfish (*Squalus cubensis*), little gulper shark (*Squalus uyato*), velvet dogfish (*Zameus squamulosus*) |
| Skates and rays | **Cownose ray (*Rhinoptera bonasus*)**, spotted eagle ray (*Aetobatus narinari*), leaf-nose leg skate (*Anacanthobatis folirostris*), spinose skate (*Breviraja spinosa*), skillet skate (*Dactylobatus armatus*), southern stingray (*Dasyatis americana*), rough-tailed northern stingray (*Dasyatis centroura*), longnose stingray (*Dasyatis guttata*), Atlantic stingray (*Dasyatis sabina*), bluntnose stingray (*Dasyatis say*), San Blas skate (*Dipturus garricki*), spreadfin skate (*Dipturus olseni*), Gulf of Mexico pygmy skate (*Fenestraja sinusmexicanus*), spiny butterfly ray (*Gymnura altavela*), smooth butterfly ray (*Gymnura micrura*), Gulf chimaera (*Hydrolagus alberti*), large-eyed rabbitfish (*Hydrolagus mirabilis*), freckled skate (*Leucoraja lentiginosa*), manta ray (*Manta birostris*), bullnose eagle ray (*Myliobatis freminvillei*), Brazilian electric ray (*Narcine brasiliensis*), ocellate skate (*Raja ackleyi*), clearnose skate (*Raja eglanteria*), roundel skate (*Raja texana*), Bigelow's ray (*Rajella bigelowi*), purplebelly skate (*Rajella purpuriventralis*), Atlantic guitarfish (*Rhinobatos lentiginosus*), Atlantic electric ray (*Torpedo nobiliana*), yellow stingray (*Urobatis jamaicensis*) |
| Gag | **Gag (*Mycteroperca microlepis*)** |
| Red grouper | **Red grouper (*Epinephelus morio*)** |
| Scamp | **Scamp (*Mycteroperca phenax*)** |
| Shallow Serranidae | **Black sea bass (*Centropristis striata*)**, mutton hamlet (*Alphestes afer*), bank sea bass (*Centropristis ocyurus*), rock sea bass (*Centropristis philadelphica*), graysby grouper (*Cephalopholis cruentata*), coney grouper (*Cephalopholis fulva*), dwarf sand perch (*Diplectrum bivittatum*), sand perch (*Diplectrum formosum*), orck hind (*Epinephelus adscensionis*), red hind (*Epinephelus guttatus*), goliath grouper (*Epinephelus itajara*), Nassau grouper (*Epinephelus striatus*), barred hamlet (*Hypoplectrus puella*), butter hamlet (*Hypoplectrus unicolor*), comb grouper (*Mycteroperca acutirostris*), black grouper (*Mycteroperca bonaci*), yellowmouth grouper (*Mycteroperca interstitialis*), tiger grouper (*Mycteroperca tigris*), yellowfin grouper (*Mycteroperca venenosa*), whitespotted soapfish (*Rypticus maculatus*), school bass (*Schultzea beta*), pygmy sea bass (*Serraniculus pumilio*), blackear sea bass (*Serranus atrobranchus*), belted sandfish (*Serranus subligarius*) |
| Deep Serranidae | **Yellowedge grouper (*Hyporthodus flavolimbatus*)**, anthias (*Bathyanthias mexicanus*), calico grouper (*Epinephelus drummondhayi*), misty grouper (*Hyporthodus mystacinus*), Warsaw grouper ( *Hyporthodus nigritus*), snowy grouper (*Hyporthodus niveatus*), longtail bass (*Hemanthias leptus*), red barbier (*Hemanthias vivanus*), bigeye bass (*Pronotogrammus eos*), routhtongue bass (*Pronotogrammus martinicensis*), saddle bass (*Serranus notospilus*), tattler bass (*Serranus phoebe*) |
| Red snapper | **Red snapper (*Lutjanus campechanus*)** |
| Vermilion snapper | **Vermilion snapper (*Rhomboplites aurorubens*)** |
| Lutjanidae | **Gray snapper (*Lutjanus griseus*)**, blear-eyed snapper (*Etelis oculatus*), mutton snapper (*Lutjanus analis*), schoolmaster snapper (*Lutjanus apodus*), blackfin snapper (*Lutjanus buccanella*), cubera snapper (*Lutjanus cyanopterus*), dogteeth snapper (*Lutjanus jocu*), mahogany snapper (*Lutjanus mahogoni*), lane snapper (*Lutjanus synagris*), silky snapper (*Lutjanus vivanus*), yellowtail snapper (*Ocyurus chrysurus*), wenchman (*Pristipomoides aquilonaris*) |
| Bioeroding fish | **Emerald parrotfish (*Nicholsina usta usta*)**, stripped parrotfish (*Scarus iseri*), princess parrotfish (*Scarus taeniopterus*), redband parrotfish (*Sparisoma aurofrenatum*), redtail parrotfish (*Sparisoma chrysopterum*), bucktooth parrotfish (*Sparisoma radians*), spotlight parrotfish (*Sparisoma viride*) |
| Large reef fish | **Doctorfish (*Acanthurus chirurgus*)**, ocean surgeon (*Acanthurus bahianus*), blue tang surgeonfish (*Acanthurus coeruleus*), Gulf surgeonfish (*Acanthurus randalli*), unicorn filefish (*Aluterus Monoceros*), black margate (*Anisotremus surinamensis*), Caribbean trumpetfish (*Aulostomus maculatus*), gray triggerfish (*Balistes capriscus*), queen triggerfish (*Balistes vetula*), grass porgy (*Calamus arctifrons*), jolthead porgy (*Calamus bajonado*), goat’s head porgy (*Calamus calamus*), whitebone porgy (*Calamus leucosteus*), knobbed progy (*Calamus nodosus*), sheepshead porgy (*Calamus penna*), pluma porgy (*Calamus pennatula*), littlehead porgy (*Calamus proridens*), rough triggerfish (*Canthidermis maculate*), filefish (*Canthidermis sufflamen*), goldface toby (*Canthigaster jamestyleri*), Atlantic spadefish (*Chaetodipterus faber*), bicolor eel (*Chlopsis bicolor*), red hogfish (*Decodon puellaris*), Caribbean chestnut (*Enchelycore carychroa*), mottled conger moray (*Enchelycore nigricans*), cornet fish (*Fistularia petimba*), bluespotted cornetfish (*Fistularia tabacaria*), black moray (*Gymnothorax funebris*), bastard eel (*Gymnothorax miliaris*), common conger (*Gymnothorax moringa*), blackedge moray (*Gymnothorax nigromarginatus*), ocellated moray (*Gymnothorax ocellatus*), honeycomb moray (*Gymnothorax saxicola*), brown conger (*Gymnothorax vicinus*), white margate (*Haemulon album*), glasseye (*Heteropriacanthus cruentatus*), angelfish (*Holacanthus bermudensis*), queen angelfish (*Holacanthus ciliaris*), Bermuda blue angelfish (*Holacanthus isabelita*), common squirrelfish (*Holocentrus adscensionis*), longspine squirrelfish (*Holocentrus rufus*), common false moray (*Kaupichthys hyoproroides*), yellow sea chub (*Kyphosus incisor*), Bermuda chub (*Kyphosus spectator*), hogfish (*Lachnolaimus maximus*), spotted trunkfish (*Lactophrys bicaudalis*), buffalo trunkfish (*Lactophrys trigonus*), sharptail eel (*Myrichthys breviceps*), bastard soldierfish (*Myripristis jacobus*), speckled worm eel (*Myrophis punctatus*), bigeye soldierfish (*Ostichthys trachypoma*), red porgy (*Pagrus pagrus*), margintail conger (*Paraconger caudilimbatus*), creole fish (*Paranthias furcifer*), gray angelfish (*Pomacanthus arcuatus*), Atlantic bigeye (*Priacanthus arenatus*), short bigeye (*Pristigenys alta*), spotted trunkfish (*Rhinesomus bicaudalis*), smooth trunkfish (*Rhinesomus triqueter*), deepwater squirrelfish (*Sargocentron bullisi*), reef squirrelfish (*Sargocentron coruscum*), saddle squirrelfish (*Sargocentron poco*), black-barred squirrelfish (*Sargocentron vexillarium*), great barracuda (*Sphyraena barracuda*), northern sennet (*Sphyraena borealis*), guachanche barracuda (*Sphyraena guachancho*), bluehead (*Thalassoma bifasciatum*), marbled moray (*Uropterygius macularius*) |
| Small reef fish | **White grunt (*Haemulon plumierii*)**, sergeant-major (*Abudefduf saxatilis*), cowfish (*Acanthostracion polygonius*), dottered filefish (*Aluterus heudelotii*), scrawled filefish (*Aluterus scriptus*), grannyfish (*Amblycirrhitus pinos*), Atlantic porkfish (*Anisotremus virginicus*), flagpole frogfish (*Antennarius multiocellatus*), big-eyed frogfish (*Antennarius radiosus*), bigtooth cardinalfish (*Apogon affinis*), bridle cardinalfish (*Apogon aurolineatus*), barred cardinalfish (*Apogon binotatus*), flamefish (*Apogon maculatus*), twospot cardinalfish (*Apogon pseudomaculatus*), belted cardinalfish (*Apogon townsendi*), brim (*Archosargus rhomboidalis*), porkfish (*Arisotremus virginicus*), bronze cardinalfish (*Astrapogon alutus*), hogfish (*Bodianus pulchellus*), Spanish hogfish (*Bodianus rufus*), lesser bream (*Brama dussumieri*), American whitespotted filefish (*Cantherhines macrocerus*), prangespotted filefish (*Cantherhines pullus*), Caribbean sharpnose puffer (*Canthigaster rostrata*), Atlantic pearlfish (*Carapus bermudensis*), cherub pygmy angelfish (*Centropyge argi*), butterfly (*Chaetodon capistratus*), spotfin butterflyfish (*Chaetodon ocellatus*), reef butterflyfish (*Chaetodon sedentarius*), banded butterflyfish (*Chaetodon striatus*), blue chromis (*Chromis cyanea*), Caribbean chromis (*Chromis enchrysura*), oliver chromis (*Chromis insolata*), chromis (*Chromis multilineata*), purple chromis (*Chromis scotti*), barracuda waitin boy (*Clepticus parrae*), barred grunt (*Conodon nobilis*), luminous deepsea cardinalfish (*Epigonus macrops*), bigeye deepwater cardinalfish (*Epigonus pandionis*), tomtate (*Haemulon aurolineatum*), black grunt (*Haemulon carbonarium*), banana grunt (*Haemulon chrysargyreum*), French grunt (*Haemulon flavolineatum*), Fus stick grunt (*Haemulon macrostomum*), blacktail grunt (*Haemulon melanurum*), sailor’s grunt (*Haemulon parra*), bluestrip grunt (*Haemulon sciurus*), striped grunt (*Haemulon striatum*), greenband wrasse (*Halichoeres bathyphilus*), slippery dick (*Halichoeres bivittatus*), Mardi gras wrasse (*Halichoeres burekae*), painted wrasse (*Halichoeres caudalis*), yellowhead wrasse (*Halichoeres garnoti*), clown wrasse (*Halichoeres maculipinna*), blackear wrasse (*Halichoeres poeyi*), puddingwife wrasse (*Halichoeres radiates*), rock beauty (*Holacanthus tricolor*), bullhead fry (*Hypoatherina harringtonensis*), yellowtail damselfish (*Microspathodon chrysurus*), fringed filefish (*Monacanthus ciliates*), *Paradiplogrammus bairdi*, Conklin’s cardinalfish (*Phaeoptyx conklini*), dusky cardinalfish (*Phaeoptyx pigmentaria*), sponge cardinalfish (*Phaeoptyx xenus*), keeltail needlefish (*Platybelone argalus argalus*), cardinal soldierfish (*Plectrypops retrospinis*), longsnout butterflyfish (*Prognathodes aculeatus*), bank butterflyfish (*Prognathodes aya*), marbled puffer (*Sphoeroides dorsalis*), southern puffer (*Sphoeroides nephelus*), blunthead puffer (*Sphoeroides pachygaster*), least puffer (*Sphoeroides parvus*), bandtail puffer (*Sphoeroides spengleri*), bicolor damselfish (*Stegastes partitus*), threespot damselfish (*Stegastes planifrons*), cocoa damselfish (*Stegastes variabilis*), common filefish (*Stephanolepis hispidus*), pygmy filefish (*Stephanolepis setifer*), Atlantic needlefish (*Strongylura marina*), redfin needlefish (*Strongylura notata notata*), timucu (*Strongylura timucu*), cleaver wrasse (*Xyrichtys novacula*), green razorfish (*Xyrichtys splendens*) |
| Black drum | **Black drum (*Pogonias cromis*)** |
| Red drum | **Red drum (*Sciaenops ocellatus*)** |
| Seatrouts | **Sand seatrout (*Cynoscion arenarius*)**, spotted seatrout (*Cynoscion nebulosus*), silver seatrout (*Cynoscion nothus*) |
| Sciaenidae | **Gulf kingfish (*Menticirrhus littoralis*)**, silver perch (*Bairdiella chrysoura*), striped croaker (*Bairdiella sanctaeluciae*), jack-knife fish (*Equetus lanceolatus*), banded drum (*Larimus fasciatus*), spot (*Leiostomus xanthurus*), southern croaker (*Menticirrhus americanus*), kingfish (*Menticirrhus saxatilis*), whitemouth croaker (*Micropogonias furnieri*), Atlantic croaker (*Micropogonias undulatus*), highhat (*Pareques acuminatus*), black-bar drum (*Pareques iwamoto*), cubbuyu (*Pareques umbrosus*), American stardrum (*Stellifer lanceolatus*), sand drum (*Umbrina coroides*) |
| Ladyfish | **Northern ladyfish (*Elops saurus*)**, southern ladyfish (*Elops smithi)* |
| Mullets | **Striped mullet (*Mugil cephalus*)**, silver mullet (*Mugil curema*), fantail mullet (*Mugil gyrans*) |
| Pompanos | **Florida pompano (*Trachinotus carolinus*)**, permit (*Trachinotus falcatus*), great pompano (*Trachinotus goodei*) |
| Sheepshead | **Sheepshead (*Archosargus probatocephalus*)** |
| Snooks | **Common snook (*Centropomus undecimalis*)**, fat snook (*Centropomus parallelus*), tarpon snook (*Centropomus pectinatus*) |
| Flatfish | **Gulf flounder (*Paralichthys albigutta*)**, lined sole (*Achirus lineatus*), three-eye flounder (*Ancylopsetta dilecta*), Gulf of Mexico ocellated flounder (*Ancylopsetta ommata*), eyed flounder (*Bothus ocellatus*), spottail flounder (*Bothus robinsi*), pelican flounder (*Chascanopsetta lugubris*), Gulf Stream flounder (*Citharichthys arctifrons*), horned whiff (*Citharichthys cornutus*), spotted whiff (*Citharichthys macrops*), bay whiff (*Citharichthys spilopterus*), Mexican flounder (*Cyclopsetta chittendeni*), spotfin flounder (*Cyclopsetta fimbriata*), American spiny flounder (*Engyophrys senta*), fringed flounder (*Etropus crossotus*), smallmouth flounder (*Etropus microstomus*), gray flounder (*Etropus rimosus*), shrimp flounder (*Gastropsetta frontalis*), naked sole (*Gymnachirus melas*), fringed sole (*Gymnachirus texae* ), slim flounder (*Monolene antillarum*), southern flounder (*Paralichthys lethostigma*), broad flounder (*Paralichthys squamilentus*), deepwater dab (*Poecilopsetta beanii*), blackback (*Pseudopleuronectes americanus*), shoal flounder (*Syacium gunteri*), channel flounder (*Syacium micrurum*), dusky flounder (*Syacium papillosum*), offshore tonguefish (*Symphurus civitatium*), spottedfin tonguefish (*Symphurus diomedeanus*), pygmy tonguefish (*Symphurus parvus*), longtail tonguefish (*Symphurus pelicanus*), deepwater tonguefish (*Symphurus piger*), blackcheek tonguefish (*Symphurus plagiusa*), blotchfin tonguefish (*Symphurus stigmosus*), spottail tonguefish (*Symphurus urospilus*), sash flounder (*Trichopsetta ventralis*), hogchoker (*Trinectes maculatus*) |
| Other demersal fish | **Hardhead (*Ariopsis felis*)**, key worm eel (*Ahlia egmontis*), shafted bonefish (*Albula nemoptera*), bonefish (*Albula vulpes*), Agassiz’ slickhead (*Alepocephalus agassizii*), brown slickhead (*Alepocephalus australis*), smalleye smooth-head (*Alepocephalus productus*), American eel (*Anguilla rostrata*), ocellated frogfish (*Antennarius ocellatus*), black angler (*Antennarius striatus*), fangtooth snake eel (*Aplatophis chauliodus*), onestripe eel (*Aprognathodon platyventris*), silver rag (*Ariomma bondi*), Baleares conger (*Ariosoma balearicum*), *Asquamiceps caeruleus*, catfish (*Bagre marinus*), bigeye slickhead (*Bajacalifornia megalops*), sooty eel (*Bascanichthys bascanium*), whip eel (*Bascanichthys scuticaris*), smallcale smooth-head (*Bathytroctes microlepis*), shortfin searorbin (*Bellator brachychir*), streamer searorbin (*Bellator egretta*), horned searorbin (*Bellator militaris*), shorttail snake eel (*Callechelys guineensis*), blotched snake eel (*Callechelys muraena*), ridgefin eel (*Callechelys springeri*), porcupine fish (*Chilomycterus atringa*), striped burrfish (*Chilomycterus schoepfi*), seagrass eel (*Chilorhinus suensonii*), American conger (*Conger oceanicus*), longfin smooth-head (*Conocara macropterum*), Murray’s smooth-head (*Conocara murrayi*), batfish (*Dactylopterus volitans*), Atlantic batfish (*Dibranchus atlanticus*), *Dibranchus tremendus*, longspined porcunepinefish (*Diodon holocanthus*), spot-fin porcunepinefish (*Diodon hystrix*), *Diplacanthopoma brachysoma*, spottail seabream (*Diplodus holbrookii*), fat sleeper (*Dormitator maculatus*), arrowtooth eel (*Dysomma anguillare*), spotted spoon-nose eel (*Echiophis intertinctus*), snapper eel (*Echiophis punctifer*), threadfin dragonfish (*Echiostoma barbatum*), small-scaled spinycheek sleeper (*Eleotris pisonis*), indifferent eel (*Ethadophis akkistikos*), barbel (*Galeichthys feliceps*), blackgut conger (*Gnathophis bathytopos*), longeye conger (*Gnathophis bracheatopos*), bigmouth sleeper (*Gobiomorus dormitor*), horsehair eel (*Gordiichthys irretitus*), gold brotula (*Gunterichthys longipenis*), saddled moray (*Gymnothorax conspersus*), blacktail moray (*Gymnothorax kolpos*), blackbelly rosefish (*Helicolenus dactylopterus*), freckled pike-conger (*Hoplunnis macrura*), conger eel (*Hoplunnis tenuis*), jellynose (*Ijimaia antillarum*), muddy arrowtooth eel (*Ilyophis brunneus*), lancer stargazer (*Kathetostoma albigutta*), collared eel (*Kaupichthys nuchalis*), smooth puffer (*Lagocephalus laevigatus*), blackedge cusk-eel (*Lepophidium brevibarbe*), cusk-eel (*Lepophidium jeannae*), blackrim cusk-eel (*Lepophidium profundorum*), barred cusk-eel (*Lepophidium staurophor*), grenadier smooth-head (*Leptoderma macrops*), American sailfin eel (*Letharchus velifer*), linesider (*Morone saxatilis*), moray eel (*Muraena retifera*), blackhead salmon (*Narcetes stomias*), ridged eel (*Neoconger mucronatus*), spinycheek scorpionfish (*Neomerinthe hemingwayi*), Cape snaggletooth (*Neonesthes capensis*), longnose batfish (*Ogcocephalus corniger*), polka-dot batfish (*Ogcocephalus cubifrons*), slantbrow batfish (*Ogcocephalus declivirostris*), redbellied batfish (*Ogcocephalus nasutus*), spotted batfish (*Ogcocephalus pantostictus*), polka-dot dotfish (*Ogcocephalus radiatus*), shy brotula (*Ogilbia suarezae*), Gomes’ snake eel (*Ophichthus gomesii*), palespotted eel (*Ophichthus puncticeps*), keoghfish (*Ophichthus rex*), longnose cusk-eel (*Ophidion antipholus*), longnose cusk-eel (*Ophidion beani*), shorthead cusk-eel (*Ophidion dromio*), blotched cusk-eel (*Ophidion grayi*), band cusk-eel (*Ophidion holbrookii*), crested cusk-eel (*Ophidion josephi*), crested cusk-eel (*Ophidion welshi*), Gulf toadfish (*Opsanus beta*), bicolor toadfish (*Opsanus dichrostomus*), leopard toadfish (*Opsanus pardus*), polka-dot cusk-eel (*Otophidium omostigma*), slender searorbin (*Peristedion gracile*), Atlantic threadfin (*Polydactylus octonemus*), Atlantic grunt (*Pomadasys crocro*), longsnout scorpionfish (*Pontinus castor*), longspine scorpionfish (*Pontinus longispinis*), Atlantic midshipman (*Porichthys plectrodon*), *Porogadus catena*, slender cuskeel (*Porogadus miles*), spiny searorbin (*Prionotus alatus*), bigeye searorbin (*Prionotus longispinosus*), barred searorbin (*Prionotus martis*), bandtail searorbin (*Prionotus ophryas*), Mexican searorbin (*Prionotus paralatus*), bluespotted searorbin (*Prionotus roseus*), blackwing searorbin (*Prionotus rubio*), leopard searorbin (*Prionotus scitulus*), shortwing searorbin (*Prionotus stearnsi*), bigeye searorbin (*Prionotus tribulus*), copper pilot (*Pseudupeneus maculatus*), yellow conger (*Rhynchoconger flavus*), whiptail conger (*Rhynchoconger gracilior*), softskin smooth-head (*Rouleina attrita*), longface eel (*Saurenchelys cognita*), Brazilian lizardfish (*Saurida brasiliensis*), smallscale lizardfish (*Saurida caribbaea*), shortjaw lizardfish (*Saurida normani*), longfin scorpionfish (*Scorpaena agassizii*), goosehead scorpionfish (*Scorpaena bergii*), babrfish (*Scorpaena brasiliensis*), red scorpionfish (*Scorpaena calcarata*), hunchback scorpionfish (*Scorpaena dispar*), mushroom scorpionfish (*Scorpaena inermis*), smooth-cheek scorpionfish (*Scorpaena isthmensis*), spotted scorpionfish (*Scorpaena plumieri*), longspine porgy (*Stenotomus caprinus*), longbarb scaly dragonfish (*Stomias longibarbatus*), blackmouth bass (*Synagrops bellus*), Gilbert's synaphobranchid eel (*Synaphobranchus affinis*), shortdorsal cutthroat eel (*Synaphobranchus brevidorsalis*), *Synaphobranchus oregonii*, inshore lizardfish (*Synodus foetens*), sand diver (*Synodus intermedius*), offshore lizardfish (*Synodus poeyi*), diamond liardfish (*Synodus synodus*), hairfin smooth-head (*Talismania homoptera*), bluntnose lizardfish (*Trachinocephalus myops*), Atlantic thornyhead (*Trachyscorpia cristulata cristulata*), Atlantic cutlassfish (*Trichiurus lepturus*), dwarf goatfish (*Upeneus parvus*), threadtail conger (*Uroconger syringinus*), southern codling (*Urophycis floridana*), spotted codling (*Urophycis regia*), Atlantic gymnast (*Xenodermichthys copei*), bristletooth conger (*Xenomystax congroides*), tricorn batfish (*Zalieutes mcgintyi*) |
| Small demersal fish | **Rainwater killifish (*Lucania parva*)**, roughhead benny (*Acanthemblemaria aspera*), pipehorse (*Acentronura dendritica*), diamond killifish (*Adinia xenica*), fringed pipefish (*Anarchopterus criniger*), southern stargazer (*Astroscopus y-graecum*), river goby (*Awaous banana*), frillfin goby (*Bathygobius soporator*), goby flathead (*Bembrops gobioides*), ragged goby (*Bollmannia communis*), flecked pikeblenny (*Chaenopsis roseola*), striped blenny (*Chasmodes bosquianus*), longjaw blenny (*Chasmodes longimaxilla*), whitenose pipefish (*Cosmocampus albirostris*), darter goby (*Ctenogobius boleosoma*), blotchcheek goby (*Ctenogobius fasciatus*), American freshwater goby (*Ctenogobius shufeldti*), marked goby (*Ctenogobius stigmaticus*), sheepshead minnow (*Cyprinodon variegatus variegatus*), speckled stargazer (*Dactyloscopus moorei*), sand stargazer (*Dactyloscopus tridigitatus*), broad shad (*Diapterus auratus*), threadfin shad (*Dorosoma petenense*), chain pearlfish (*Echiodon dawsoni*), neon goby (*Elacatinus oceanops*), semiscaled goby (*Elacatinus pallens*), Leopard goby (*Elacatinus saucrus*), large-scaled spinycheek sleeper (*Eleotris amblyopsis*), banner blenny (*Emblemaria atlantica*), sailfin blenny (*Emblemaria pandionis*), pirate blenny (*Emblemaria piratula*), roughhead triplefin (*Enneanectes boehlkei*), redeye blenny (*Enneanectes pectoralis*), pearl blenny (*Entomacrodus nigricans*), emerald blenny (*Erotelis smaragdus*), silver mojarra (*Eucinostomus argenteus*), common mojarra (*Eucinostomus gula*), tidewater mojarra (*Eucinostomus harengulus*), slender mojarra (*Eucinostomus jonesii*), Florida mojarra (*Eucinostomus lefroyi*), butterfish (*Eucinostomus melanopterus*), Brazilian mojarra (*Eugerres brasilianus*), striped mojarra (*Eugerres plumieri*), *Eumegistus brevorti*, *Eustomias achirus*, *Eustomias acinosus*, *Eustomias arborifer*, *Eustomias bibulbosus*, *Eustomias bigelowi*, *Eustomias binghami*, *Eustomias braueri*, *Eustomias brevibarbatus*, *Eustomias dendriticus*, *Eustomias filifer*, *Eustomias fissibarbis*, *Eustomias hypopsilus*, *Eustomias longibarba*, *Eustomias macrophthalmus*, *Eustomias macrurus*, *Eustomias monoclonus*, *Eustomias obscurus*, *Eustomias polyester*, *Eustomias schmidti*, *Eustomias variabilis*, lyre goby (*Evorthodus lyricus*), goldspotted killifish (*Floridichthys carpio*), marsh killifish (*Fundulus confluentus*), Gulf killifish (*Fundulus grandis*), saltmarsh topminnow (*Fundulus jenkinsi),* stripped killifish (*Fundulus majalis*), bayou killifish (*Fundulus pulvereus*), broad mojarra (*Gerres cinereus*), masked stargazer (*Gillellus healae*), freckled stargazer (*Gnathagnus egregius*), skilletfish (*Gobiesox strumosus*), violet goby (*Gobioides broussonnetii*), highfin goby (*Gobionellus oceanicus*), naked goby (*Gobiosoma bosc*), code goby (*Gobiosoma robustum*), pancake batfish (*Halieutichthys aculeatus*), spiny batfish (*Halieutichthys bispinosus*), horsefish (*Hippocampus erectus*), dwarf seahorse (*Hippocampus zosterae*), frogfish (*Histrio histrio*), tessellated blenny (*Hypsoblennius invemar*), mangrove rivulus (*Kryptolebias marmoratus*), puffcheek blenny (*Labrisomus bucciferus*), goggle eye blenny (*Labrisomus gobio*), mimic blenny (*Labrisomus guppyi*), longfin blenny (*Labrisomus haitiensis*), downy blenny (*Labrisomus kalisherae*), spotcheek blenny (*Labrisomus nigricinctus*), hairy blenny (*Labrisomus nuchipinnis*), threeline basslet (*Lipogramma trilineata*), swordtail jawfish (*Lonchopisthus micrognathus*), mangrove blenny (*Lupinoblennius dispar*), highfin blenny (*Lupinoblennius nicholsi*), bellowfish (*Macroramphosus scolopax*), goldline blenny (*Malacoctenus aurolineatus*), dusky blenny (*Malacoctenus gilli*), rosy blenny (*Malacoctenus macropus*), saddled blenny (*Malacoctenus triangulatus*), *Melamphaes eulepis*, *Melamphaes pumilus*, *Melamphaes simus*, *Melamphaes typhlops*, lancetail wormfish (*Microdesmus lanceolatus*), pink wormfish (*Microdesmus longipinnis*), seminole goby (*Microgobius carri*), clown goby (*Microgobius gulosus*), banner goby (*Microgobius microlepis*), green goby (*Microgobius thalassinus*), opossum river pipefish (*Microphis brachyurus lineatus*), yellowtail goatfish (*Mulloidichthys martinicus*), red goatfish (*Mullus auratus*), pygmy pikeconger (*Nettenchelys pygmaea*), redlip blenny (*Ophioblennius macclurei*), moustache jawfish (*Opistognathus lonchurus*), banded jawfish (*Opistognathus macrognathus*), Opistognathus nothus, pigfish (*Orthopristis chrysoptera*), spotfin goby (*Oxyurichthys stigmalophius*), mauve goby (*Palatogobius paradoxus*), seaweed goby (*Parablennius marmoreus*), marbled goby (*Paraclinus marmoratus*), short-tube scorpionfish (*Phenacoscorpius nebris*), blue goby (*Ptereleotris calliura*), smallmouth goby (*Risor ruber*), molly miller (*Scartella cristata*), blackbar blenny (*Starksia fasciata*), checkered blenny (*Starksia ocellata*), keelcheek bass (*Synagrops spinosus*), threespine bass (*Synagrops trispinosus*), dusky pipefish (*Syngnathus floridae*), northern pipefish (*Syngnathus fuscus*), chain pipefish (*Syngnathus louisianae*), pelagic pipefish (*Syngnathus pelagicus*), Gulf pipefish (*Syngnathus scovelli*) |
| Yellowfin tuna | **Yellowfin tuna (*Thunnus albacares*)** |
| Bluefin tuna | **Atlantic bluefin tuna (*Thunnus thynnus*)** |
| Little tunny | **Little tunny (*Euthynnus alletteratus*)** |
| Other tunas | **Bigeye tuna (*Thunnus obesus*)**, bullet tuna (*Auxis rochei*), frigate tuna (*Auxis thazard*), skipjack tuna (*Katsuwonus pelamis*), albacore (*Thunnus atlanticus*) |
| Swordfish | **Swordfish (*Xiphias gladius*)** |
| White marlin | **White marlin (*Tetrapturus albidus*)** |
| Blue marlin | **Blue marlin (*Makaira nigricans*)** |
| Other billfish | **Atlantic sailfish (*Istiophorus albicans*)**, bayonet fish (*Istiophorus platypterus*), longbill spearfish (*Tetrapturus pfluegeri*) |
| Greater amberjack | **Greater amberjack (*Seriola dumerili*)** |
| Jacks | **Round scad (*Decapterus punctatus*)**, African pompano (*Alectis ciliaris*), coolihoo (*Carangoides bartholomaei*), blue runner (*Caranx crysos*), crevalle jack (*Caranx hippos*), horse-eye jack (*Caranx latus*), black jack (*Caranx lugubris*), bar jack (*Caranx ruber*), Atlantic bumper (*Chloroscombrus chrysurus*), mackerel scad (*Decapterus macarellus*), rainbow runner (*Elagatis bipinnulata*), bluntnose jack (*Hemicaranx amblyrhynchus*), pilotfish (*Naucrates doctor*), leatherjack (*Oligoplites saurus*), bigeye scad (*Selar crumenophthalmus*), Atlantic moonfish (*Selene setapinnis*), lookdown (*Selene vomer*), lesser amberjack (*Seriola fasciata*), almaco jack (*Seriola* *rivoliana*), banded rudderfish (*Seriola zonata*), jack mackerel (*Trachurus lathami*) |
| King mackerel | **King mackerel (*Scomberomorus cavalla*)** |
| Spanish mackerel | **Spanish mackerel (*Scomberomorus maculatus*)** |
| Spanish sardine | **Spanish sardine (*Sardinella aurita*)** |
| Large pelagic fish | **Mahi mahi (*Coryphaena equiselis*)**, wahoo (*Acanthocybium solandri*), common dolphinfish (*Coryphaena hippurus*), live sharksucker (*Echeneis naucrates*), whitefin sharksucker (*Echeneis neucratoides*), Atlantic tripletail (*Lobotes surinamensis*), luvar (*Luvarus imperialis*), sharpfin sunfish (*Masturus lanceolatus*), Atlantic tarpon (*Megalops atlanticus*), giant sunfish (*Mola mola*), lousefish (*Phtheirichthys lineatus*), bluefish (*Pomatomus saltatrix*), cobia (*Rachycentron canadum*), giant oarfish (*Regalecus glesne*), *Remora albescens*, whale remora (*Remora australis*), grey marlinsucker (*Remora brachyptera*), hardfin marlinsucker (*Remora osteochir*), brown remora (*Remora remora*), mantasucker (*Remorina albescens*), Atlantic bonito (*Sarda sarda*), cero mackerel (*Scomberomorus regalis*) |
| Deep water fish | **Great northern tilefish (*Lopholatilus chamaeleonticeps*)**, bony-eared assfish (*Acanthonus armatus*), *Ahliesaurus berryi*, Gilbert's halosaurid fish (*Aldrovandia affinis*), *Aldrovandia gracilis*, day sarpon (*Alepisaurus ferox*), horned sabretooth (*Anoplogaster brachycera*), common fangtooth (*Anoplogaster cornuta*), deepbody boarfish (*Antigonia capros*), shortspine boarfish (*Antigonia combatia*), black gabbard fish (*Aphanopus intermedius*), gelatinous blindfish (*Aphyonus gelatinosus*), blackbelly argentine (*Argentina georgei*), striated argentine (*Argentina striata*), Atlantic silver hatchetfish (*Argyropelecus aculeatus*), deepsea hatchetfish (*Argyropelecus affinis*), giant hatchetfish (*Argyropelecus gigas*), half-naked hatchetfish (*Argyropelecus hemigymnus*), Sladen’s hatchetfish (*Argyropelecus sladeni*), brown driftfish (*Ariomma melanum*), spotted driftfish (*Ariomma regulus*), *Aristostomias grimaldii*, *Aristostomias lunifer*, *Aristostomias polydactylus*, *Aristostomias tittmanni*, *Aristostomias xenostoma*, *Astronesthes cyaneus*, *Astronesthes gemmifer*, *Astronesthes indicus*, *Astronesthes macropogon*, *Astronesthes micropogon*, *Astronesthes niger*, *Astronesthes richardsoni*, *Astronesthes similus*, Mediterranean flagfin (*Aulopus filamentosus*), avocet snipe-eel (*Avocettina infans*), *Barathronus bicolor*, *Bassogigas gillii*, *Bassozetus compressus*, *Bassozetus robustus*, *Bathophilus digitatus*, *Bathophilus longipinnis*, *Bathophilus nigerrimus*, *Bathophilus pawneei*, *Bathyanthias cubensis*, Bathyclupea argentea, *Bathycongrus bullisi*, *Bathycongrus dubius*, *Bathycongrus vicinalis*, *Bathygadus favosus*, *Bathygadus macrops*, *Bathygadus melanobranchus*, *Bathylagichthys greyae*, *Bathyonus pectoralis*, *Bathypterois bigelowi*, *Bathypterois grallator*, *Bathypterois phenax*, *Bathypterois quadrifilis*, *Bathypterois viridensis*, highfin lizardfish (*Bathysaurus mollis*), Koefoed's smooth-head (*Bathytroctes macrolepis*), *Bathytyphlops marionae*, duckbill flathead (*Bembrops anatirostris*), ribbon scabbardfish (*Benthodesmus tenuis*), lanternfish (*Benthosema suborbital*), *Bolinichthys photothorax*, *Bolinichthys supralateralis*, *Bonapartia pedaliota*, *Borostomias elucens*, *Borostomias mononema*, *Bregmaceros atlanticus*, *Bregmaceros cantori*, *Bregmaceros cayorum*, *Bregmaceros houdei*, *Bregmaceros nectabanus*, *Brotula barbata*, *Brotulotaenia brevicauda*, *Bufoceratias wedli*, *Caelorinchus caelorhincus*, *Caelorinchus caribbaeus*, *Caelorinchus occa*, *Cataetyx laticeps*, Atlantic goldeye tilefish (*Caulolatilus chrysops*), blackline tilefish (*Caulolatilus cyanops*), anchor tilefish (*Caulolatilus intermedius*), blueline tilefish (*Caulolatilus microps*), pig-nosed lanternfish (*Centrobranchus nigroocellatus*), *Ceratoscopelus warmingii*, *Cetomimus teevani*, *Cetonurus globiceps*, dana viperfish (*Chauliodus danae*), manylight viperfsh (*Chauliodus sloani),* Suttkus sea toad (*Chaunax suttkusi*), black swallower (*Chiasmodon niger*), Agassiz's thread-sail fish (*Chlorophthalmus agassizi*), Atlantic sabretooth (*Coccorella atlantica*), *Coelorinchus caribbaeus*, *Coelorinchus carminatus*, *Coloconger meadi*, *Coryphaenoides alateralis*, *Coryphaenoides mediterraneus*, *Coryphaenoides mexicanus*, *Coryphaenoides rudis*, *Coryphaenoides zaniophorus*, Coves' horned anglerfish (Cryptopsaras couesii), bigeye cirgarfish (*Cubiceps pauciradiatus*), Bentooth bristlemouth (*Cyclothone acclinidens*), bristlemouth (*Cyclothone alba*), bentooth lightfish (*Cyclothone braueri*), veiled anglemouth (*Cyclothone microdon*), hidden brsitlemouth (*Cyclothone obscura*), colored bristlemouth (*Cyclothone pallida*), slender brsitlemouth (*Cyclothone pseudopallida*), red dory (*Cyttopsis rosea*), *Diaphus dumerilii*, *Diaphus fragilis*, *Diaphus garmani*, *Diaphus lucidus*, *Diaphus luetkeni*, *Diaphus mollis*, *Diaphus perspicillatus*, *Diaphus problematicus*, *Diaphus rafinesquii*, *Diaphus splendidus*, *Diaphus subtilis*, *Diaphus taaningi*, *Diaphus termophilus*, *Dicrolene intronigra*, *Dicrolene kanazawai*, *Diogenichthys atlanticus*, Pacific portholefish (*Diplophos taenia*), lined cutlassfish (*Diplospinus multistriatus*), black discfish (*Diretmichthys parini*), large spinyfin (*Diretmoides pauciradiatus*), silver spinyfin (*Diretmus argenteus*), double-keeled whalefish (Ditropichthys storeri), longsnout blacksmelt (*Dolicholagus longirostris*), *Dolichopteryx binocularis*, *Dolichopteryx longipes*, midwater scorpionfish (*Ectreposebastes imus*), *Eptatretus minor*, *Eptatretus springeri*, sabertooth (*Evermannella indica*), *Evermannichthys spongicola*, scaleless dragonfish (*Flagellostomias boureei*), sportfin dragonet (*Foetorepus agassizii*), beardless codling (*Gadella imberbis*), doublethread grenadier (*Gadomus arcuatus*), threadfin grenadier (*Gadomus longifilis*), snake mackerel (*Gempylus serpens*), Darwin’s redfish (*Gephyroberyx darwinii*), gibberfish (*Gibberichthys pumilus*), *Gigantura chuni*, *Gigantura indica*, pygmy argentine (*Glossanodon pygmaeus*), *Gonichthys cocco*, *Gonostoma atlanticum*, *Gonostoma elongatum*, *Grammatostomias circularis*, *Gyrinomimus myersi*, *Halosaurus guentheri*, *Halosaurus ovenii*, *Haplophryne mollis*, *Haptenchelys texis*, *Heterophotus ophistoma*, *Himantolophus cornifer*, *Himantolophus groenlandicus*, reticulate spikefish (*Hollardia hollardi*), Mediterranean slimehead (*Hoplostethus mediterraneus mediterraneus*), western roughy (*Hoplostethus occidentalis*), pelagic basslet (*Howella brodiei*), *Hygophum hygomii*, *Hygophum macrochir*, *Hygophum reinhardtii*, *Hymenocephalus aterrimus*, *Hymenocephalus billsam*, *Hymenocephalus italicus*, lightfish (*Ichthyococcus ovatus*), black dragon (*Idiacanthus fasciola*), *Ipnops murrayi*, *Kali macrodon*, *Kogia breviceps*, *Kogia simus*, bubbous rattail (*Kuronezumia bubonic*), *Lampadena luminosa*, *Lampanyctus alatus*, *Lampanyctus nobilis*, *Lampanyctus tenuiformis*, *Lampris guttatus*, *Lamprogrammus niger*, escolar (*Lepidocybium flavobrunneum*), *Lepidophanes guentheri*, *Leptostomias bermudensis*, *Leptostomias bilobatus*, *Leptostomias gladiator*, *Leptostomias haplocaulus*, *Leptostomias leptobolus*, barracudina (*Lestidiops affinis*), Atlantic barracudina (*Lestidium atlanticum*), *Lestrolepis intermedia*, *Linophryne brevibarbata*, *Linophryne densiramus*, *Lobianchia gemellarii*, *Lophiodes monodi*, *Lophiodes reticulatus*, blackfin goosefish (*Lophius gastrophysus*), crested bandfish (*Lophotus lacepede*), *Luciobrotula corethromycter*, *Lycenchelys bullisi*, *Magnisudis atlantica*, armed grenadier (*Malacocephalus laevis*), American straptail grenadier (*Malacocephalus occidentalis*), black hingded-head (*Malacosteus niger*), *Manducus maderensis*, *Margrethia obtusirostra*, *Maurolicus muelleri*, *Maurolicus weitzmani*, blackdevil (*Melanocetus johnsonii*), Murray's abyssal anglerfish (*Melanocetus murrayi*), *Melanolagus bericoides*, *Melanonus zugmayeri*, *Melanostomias biseriatus*, *Melanostomias macrophotus*, *Melanostomias margaritifer*, *Melanostomias melanopogon*, *Melanostomias melanops*, *Melanostomias tentaculatus*, *Melanostomias valdiviae*, Mentodus facilis, offshore hake (*Merluccius albidus*), dusky pencilsmelt (*Microstoma microstoma*), *Monomitopus agassizii*, *Monomitopus magnus*, *Myctophum affine*, *Myctophum asperum*, *Myctophum nitidulum*, *Myctophum obtusirostre*, *Nannobrachium atrum*, *Nannobrachium cuprarium*, *Nannobrachium lineatum*, Greenland argentine (*Nansenia groenlandica*), black snake mackerel (*Nealotus tripes*),avocet (*Nemichthys scolopaceus*), *Neobythites elongates*, *Neobythites gilli*, *Neobythites marginatus*, *Neobythites unicolor*, American snakefish (*Neoepinnula Americana*), sackfish (*Neoepinnula orientalis*), black barracoota (*Nesiarchus nasutus*), *Nettastoma melanura*, *Nettastoma melanurum*, *Nettastoma syntresis*, *Nezumia aequalis*, *Nezumia atlantica*, *Nezumia cyrano*, *Nezumia longebarbata*, *Nezumia suilla*, bluebottle fish (*Nomeus gronovii*), largescale tapirfish (*Notacanthus chemnitzii*), topside lampfish (*Notolychnus valdiviae*), *Notoscopelus caudispinosus*, *Notoscopelus resplendens*, undistinguished sabretooth (*Odontostomops normalops*), *Omosudis lowei*, *Oostethus brachyurus*, jambeau (*Parahollardia lineata*), lowfin snailfish (*Paraliparis calidus*), longnose greeneye (*Parasudis truculenta*), *Peristedion greyae*, *Peristedion imberbe*, *Peristedion longispatha*, *Peristedion miniatum*, *Peristedion thompsoni*, *Peristedion truncatum*, *Photonectes achirus*, *Photonectes braueri*, *Photonectes dinema*, *Photonectes leucospilus*, *Photonectes margarita*, *Photonectes parvimanus*, *Photonectes phyllopogon*, loosejaw (*Photostomias guernei*), *Platybelone argalus*, legless searsid (*Platytroctes apus*), stareye lightfish (*Pollichthys mauli*), *Polyacanthonotus africanus*, *Polyacanthonotus merretti*, *Polyipnus asteroides*, *Polyipnus clarus*, *Polyipnus laternatus*, *Polymetme corythaeola*, *Polymetme thaeocoryla*, beardfish (*Polymixia lowei*), ridgehead (*Poromitra capito*), crested bigscale (*Poromitra crassiceps*), bigscale (*Poromitra megalops*), Bermuda catfish (*Promethichthys Prometheus*), blue driftfish (*Psenes cyanophrys*), blackrag (*Psenes pellucidus*), purplemouthed conger (*Pseudophichthys splendens*), *Pseudoscopelus altipinnis*, *Pseudoscopelus scriptus*, abyssal smooth-head (*Rinoctes nasutus*), *Rondeletia bicolor*, Hubb's pearleye (*Rosenblattichthys hubbsi*), castor oil fish (*Ruvettus pretiosus*), *Saccogaster staigeri*, black mackerel (*Scombrolabrax heterolepis*), *Scopelarchoides danae*, *Scopelarchus analis*, *Scopelarchus guentheri*, *Scopelarchus michaelsarsi*, bigscale (*Scopeloberyx opisthopterus*), longjaw bigscale (*Scopeloberyx robustus*), *Scopelogadus beanii*, *Scopelogadus mizolepis*, Bean's sawtoothed eel (*Serrivomer beanii*), channeled rockfish (*Setarches guentheri*), *Snyderidia canina*, *Sonoda megalophthalma*, pugnose grenadier (*Sphagemacrurus grenadae*), *Squalogadus modificatus*, luminous hake (*Steindachneria argentea*), *Stemonosudis bullisi*, *Stemonosudis gracilis*, *Stemonosudis intermedia*, *Stephanoberyx monae*, *Sternoptyx diaphana*, *Sternoptyx pseudobscura*, *Stomias affinis*, *Stomias brevibarbatus*, pillar-eyed thread-tail (*Stylephorus chordates*), *Sudis atrox*, *Sudis hyalina*, slope bass (*Symphysanodon berryi*), *Taaningichthys bathyphilus*, Antillean smooth-head (*Talismania antillarum*), deal fish (*Trachipterus arcticus*), *Trachonurus sulcatus*, *Trachonurus villosus*, *Uncisudis advena*, *Uncisudis quadrimaculata*, Gulf hake (*Urophycis cirrata*), constellationfish (*Valenciennellus tripunctulatus*), *Venefica procera*, longbeard grenadier (*Ventrifossa macropogon*), slender lightfish (*Vinciguerria attenuata*), frilled lighthouse fish (*Vinciguerria nimbaria*), highseas lightfish (*Vinciguerria poweriae*), *Xenocephalus egregius*, spotted tinselfish (*Xenolepidichthys dalgleishi*), *Xenophthalmichthys danae*, *Xyelacyba myersi*, *Yarrella blackfordi*, *Zenopsis conchifer*, scalloped ribbon fish (*Zu cristatus*) |
| Menhadens | **Gulf menhaden (*Brevoortia patronus*)**, finescale menhaden (*Brevoortia gunteri*), yellowfin menhaden (*Brevoortia smithi*) |
| Pinfish | **Pinfish (*Lagodon rhomboides*)** |
| Medium pelagic fish | **Atlantic fanfish (*Pterycombus brama*)**, Caribbean pomfret (*Brama caribbea*), bandwing flyingfish (*Cheilopogon exsiliens*), doublebearded flyingfish (*Cheilopogon furcatus*), Atlantic flyingfish (*Cheilopogon heterurus*), Atlantic flyingfish (*Cheilopogon melanurus*), flying halfbreak (*Euleptorhamphus velox*), balao (*Hemiramphus balao*), balahu (*Hemiramphus brasiliensis*), black driftfish (*Hyperoglyphe bythites*), barrelfish (*Hyperoglyphe perciformis*), bigwing halfbreak (*Oxyporhamphus micropterus*), Atlantic saury (*Scomberesox saurus saurus*), big-scale pomfret (*Taractichthys longipinnis*) |
| Small pelagic fish | **Scaled sardine (*Harengula jaguana*)**, Alabama shad (*Alosa alabamae*), skipjack shad (*Alosa chrysochloris*), key acnhovy (*Anchoa cayorum* ), Cuban anchovy (*Anchoa cubana*), broad-striped anchovy (*Anchoa hepsetus*), shortfinger anchovy (*Anchoa lyolepis*), bay anchovy (*Anchoa mitchilli*), Poey’s anchovy (*Anchoviella perfasciata*), bristle herring (*Atherinomorus stipes*), bearded flyingfish (*Cheilopogon cyanopterus*), hardhead (*Chriodorus atherinoides*), clearwing flyingfish (*Cypselurus comatus*), silver anchovy (*Engraulis eurystole*), Atlantic round herring (*Etrumeus teres*), blunt-snouted flying fish (*Exocoetus obtusirostris*), blue flying fish (*Exocoetus volitans*), false herring (*Harengula clupeola*), loose-scaled sardine (*Harengula humeralis*), flying fish (*Hirundichthys affinis*), blackwing flyingfish (*Hirundichthys rondeletii*), American halfbeak (*Hyporhamphus meeki*), balaou blanc (*Hyporhamphus unifasciatus*), blue fry (*Jenkinsia lamprotaenia*), rough silverside (*Membras martinica*), inland silverside (*Menidia beryllina*), tidewater silverside (*Menidia peninsulae*), Atlantic thread herring (*Opisthonema oglinum*), bigwing halfbeak (*Oxyporhamphus micropterus micropterus*), sailfin flyingfish (*Parexocoetus brachypterus*), butterfish (*Peprilus burti*), American harvestfish (*Peprilus paru*), American butterfish (*Peprilus triacanthus*), bluntnose flyingfish (*Prognichthys occidentalis*), Brazilian sardinella (*Sardinella janeiro*), agujon needlefish (*Tylosurus acus acus*), hound needlefish (*Tylosurus crocodilus crocodilus*) |
| Brown shrimp | **Brown shrimp (*Farfantepenaeus aztecus*)** |
| White shrimp | **White shrimp (*Litopenaeus setiferus*)** |
| Pink shrimp | **Pink shrimp (*Farfantepenaeus duorarum*)** |
| Other shrimps | **Mantis shrimp (*Squilla empusa*)**, spiny tailed deep sea pelagic shrimp (*Acanthephyra acanthitelsonis*), *Acanthephyra acutifrons*, *Acanthephyra armata*, peaked shrimp (*Acanthephyra curtirostris*), *Acanthephyra exima*, *Acanthephyra pelagica*, *Acanthephyra purpurea*, *Acanthephyra stylorostratis*, *Acetes americanus carolinae*, banded snapping shrimp (*Alpheus armillatus*), sand snapping shrimp (*Alpheus floridanus*), snapping shrimp (*Alpheus packardii*), smooth claw snapping shrimp (*Alpheus paracrinitus*), giant red shrimp (*Aristaeomorpha foliacea*), *Bentheogennema intermedia*, *Benthesicymus bartletti*, *Benthesicymus brasiliensis*, mechanical shrimp (*Cinetorhynchus rigens*), *Discias atlanticus*, *Gennadas capensis*, *Glyphocrangon aculeata*, *Glyphocrangon alispina*, *Glyphocrangon longleyi*, *Glyphocrangon nobilis*, *Hemipenaeus carpenter*, armed nylon shrimp (*Heterocarpus ensifer*), *Heterocarpus oryx*, *Heterogenys microphthalma*, cerulean sargassum shrimp (*Hippolyte coerulescens*), zostera shrimp (*Hippolyte zostericola*), *Hymenopenaeus aphoticus*, *Janicella spinicauda*, *Kemponia americanus*, slender sargassum shrimp (*Latreutes fucorum*), sargassum shrimp (*Latreutes parvulus*), brown grass shrimp (*Leander tenuicornis*), carinate grass shrimp (*Leptochela carinata*), *Lucifer faxoni*, cinnamon river shrimp (*Macrobrachium acanthurus*), bigclaw river shrimp (*Macrobrachium carcinus*), *Meningodora mollis*, *Nematocarcinus rotundus*, *Notostomus gibbosus*, *Oplophorus gracilirostris*, groove back shrimp (*Parapasiphae sulcatifrons*), rose shrimp (*Parapenaeus politus*), ghost comb shrimp (*Pasiphaea merriami*), big-eyed shrimp (*Penaeopsis serrata*), royal red shrimp (*Pleoticus robustus*), *Plesiopenaeus armatus*, *Pontophilus gracilis*, Bermuda night shrimp (*Processa bermudensis*), *Psalidopus barbouri*, *Psathyrocaris infirma*, yellow roughneck shrimp (*Rimapenaeus similis*), rock shrimp (*Sicyonia brevirostris*), spiny rock shrimp (*Sicyonia burkenroadi*), lesser rock shrimp (*Sicyonia dorsalis*), *Sicyonia parri*, kinglet rock shrimp (*Sicyonia typical*), dwarf humpback shrimp (*Solenocera atlantidis*), deep humpback shrimp (*Solenocera necopina*), banded coral shrimp (*Stenopus hispidus*), golden coral shrimp (*Stenopus scutellatus*), speckled snapping shrimp (*Synalpheus fritzmuelleri*), snapping shrimp (*Synalpheus townsendi*), *Systellaspis debilis*, *Systellaspis pellucida*, arrow shrimp (*Tozeuma carolinense*), Atlantic seabob (*Xiphopenaeus kroyeri*) |
| Blue crab | **Blue crab (*Callinectes sapidus*)** |
| Stone crab | **Stone crab (*Menippe mercenaria*)** |
| Crabs and lobsters | **Spiny lobster (*Panulirus argus*)**, Atlantic deep lobster (*Acanthacaris caeca*), gladiator box crab (*Acanthocarpus alexandri*), *Agononida longipes*, stilt spider crab (*Anasimus latus*), speckled swimming crab (*Arenaeus cribrarius*), flame box crab (*Calappa flammea*), *Chlidonophora incerta*, *Coralaxius nodulosus*, broadback sumo crab (*Ethusa microphthalma*), calico crab (*Hepatus epheliticus*), longleg frig crab (*Lysirude nitidus*), spongy decorator crab (*Macrocoeloma trispinosum*), red-ridged clinging crab (*Mithraculus forceps*), *Munida angulata*, *Munida flinti*, *Munida iris*, *Munida microphthalma*, *Munida pusilla*, *Munida valida*, *Munidopsis erinaceus*, *Munidopsis robusta*, *Munidopsis sigsbei*, *Munidopsis simplex*, fivepine purse crab (*Myropsis quinquespinosa*), Florida lobsterette (*Nephropsis aculeate*), pricky lobsterette (*Nephropsis agassizii*), two-toned lobsterette (*Nephropsis rosea*), Atlantic ghost crab (*Ocypode quadrata*), wormreef porcelain crab (*Pachycheles monilifer*), sculptured porcelain crab (*Pachycheles rugimanus*), African matchbox crab (*Pachygrapsus transversus*), mottled purse crab (*Persephona mediterranea*), green porcelain crab (*Petrolisthes armatus*), banded porcelain crab (*Petrolisthes galathinus*), shortfinger neck crab (*Podochela sidneyi*), *Polycheles sculptus*, spotted porcelain crab (*Porcellana sayana*), Spanish slipper lobster (*Scyllarides aequinoctialis*), ridged slipper lobster (*Scyllarides nodifer*), chace slipper lobster (*Scyllarus chacei*), scaled slipper lobster (*Scyllarus depressus*), furcate spider lobster (*Stenocionops furcatus*), yellowline arrow crab (*Stenorhynchus seticornis*), eroded frog crab (*Symethis variolosa*), mudflat fiddler (*Uca rapax*), squat lobster (*Uroptychus nitidus*) |
| Jellyfish | **Common jellyfish (*Aurelia aurita*)**, cannonball jellyfish (*Stomolophus meleagris*) |
| Squids | **Atlantic brief squid (*Lolliguncula brevis*)**, California market squid (*Loligo opalescens*), longfin inshore squid (*Loligo pealeii*), slender inshore squid (*Loligo plei*), squids (Theuthoidea spp.) |
| Large zooplankton | Large zooplankton |
| Small zooplankton | Small zooplankton |
| Carnivorous macrobenthos | **Atlantic black sea hare (*Aplysia morio*)**, gastropoda spp., Pycnogonida spp. |
| Infaunal meiobenthos | **Bearded fireworm (*Hermodice carunculata*)**, Polychaeta spp., Acari spp., Amphipoda spp., Aplacophora spp., Cladocera spp., Cumacea spp., Cyclopoida spp., Gastrotricha spp., Halacaridae spp., Harpacticoida spp., Isopoda spp., Kinorhyncha spp., Leptostraca spp., Loricifera spp., Mysidacea spp., Nematoda spp., Ostracoda spp., Rotifera spp., Tanaidacea spp., Tartigrada spp., Turbellaria spp. |
| Herbivorous echinoderms | **Sand dollar (*Mellita quinquiesperforata*)**, Echinoidea spp., Asteroidea spp., Holothuroidea spp. |
| Oysters | **Eastern oyster (*Crassostrea virginica*)**, Ostreoidea spp. |
| Bivalves | **Calico scallop (*Argopecten gibbus*)**, Bivalvia spp. |
| Sessile filter feeders | **Balane (*Balanus trigonus*)**, Sessilia spp., Ophiuroidea spp., Crinoidea spp., Ascidiacea spp., Brachiopoda spp., Bryozoa spp., Hydrozoa spp., Zoantharia spp. |
| Stony corals | Scelactinia spp. |
| Crustose coralline algae | Corallines spp. |
| Octocorals | Octocorallia spp. |
| Sponges | Porifera spp. |
| Epiphytes | Epiphytes |
| Seagrass | Seagrasses |
| Macroalgae | Macroalgae |
| Microphytobenthos | Microphytobenthos |
| Large phytoplankton | Large phytoplankton |
| Small phytoplankton | Small phytoplankton |
| Toxic dinoflagellates | Toxic dinoflagellates |
| Protists | Protists |
| Bacteria | Bacteria |
| Carrion detritus | - |
| Labile detritus | - |
| Refractory detritus | - |
